# Supplementary material
Source: PubMed Central journal article supplement (PMC2866049)

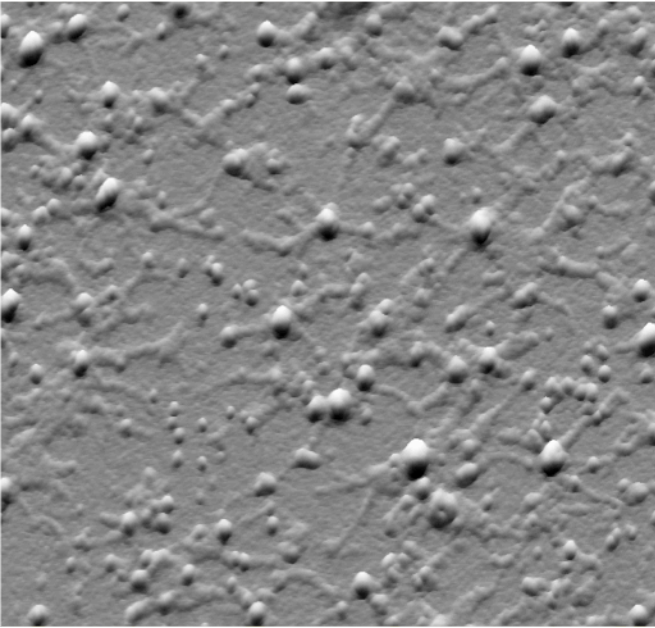

1. AFM topographic image of human salivary exosomes showing intervesicular connections

Supplement: NIHMS187006-supplement-2_si_002.pdf [file NIHMS187006-supplement-2_si_002.pdf]
